# Supplementary material for: Hydrolysis and condensation behavior of tetraethoxysilane, hexaethoxydisiloxane, and octaethoxytrisiloxane
Source: Springer Nature journal article supplement (doi:10.1007/s10971-023-06159-x), 2023-07-27
Supplement: MOESM1 [file 25856506]

Supporting Information

Hydrolysis and condensation behavior of tetraethoxysilane, hexaethoxydisiloxane, and octaethoxytrisiloxane

Yohei Sato1*, Asahi Sugimoto1, Tatsuya Iwashina1, Ryohei Hayami1, Kazuki Yamamoto1, Takahiro Gunji1,2*

1Department of Pure and Applied Chemistry, Faculty of Science and Technology, Tokyo University of Science, 2641 Yamazaki, Noda, Chiba 278-8510, Japan.

2Research Group for Advanced Energy Conversion, Research Institute for Science and Technology (RIST), Tokyo University of Science, 2641 Yamazaki, Noda, Chiba 278-8510, Japan

Corresponding authors: 7221702@ed.tus.ac.jp (Y. Sato), gunji@rs.tus.ac.jp (T. Gunji)

**GC trace of reaction solution of HEDITS for 8 h**

**
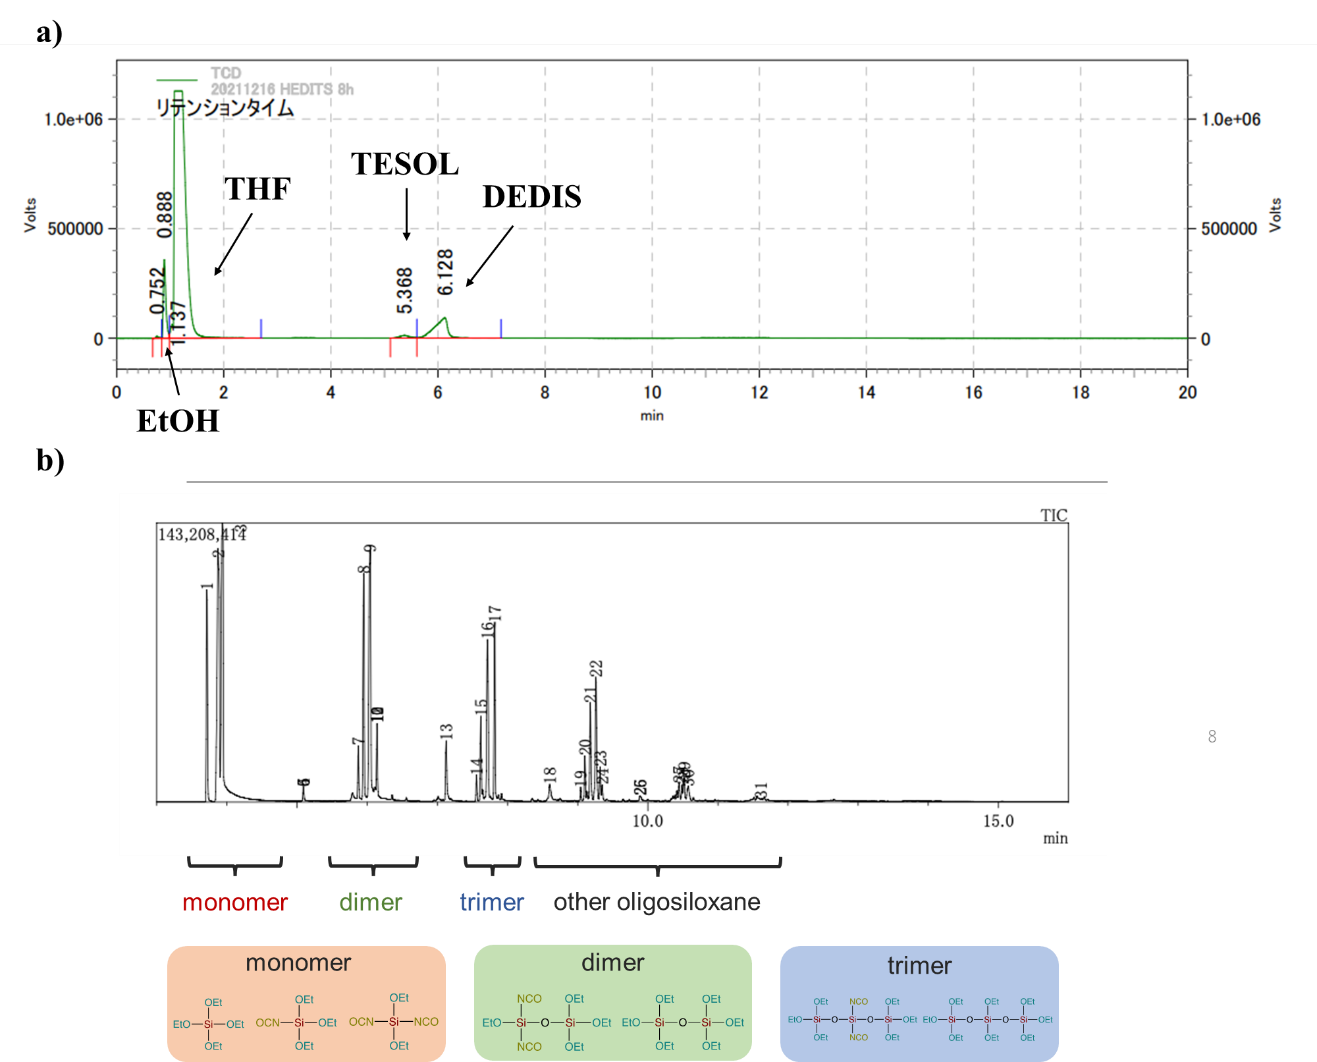
**

Figure S1. GC trace of reaction solution of HEDITS for 8 h on a) GC analysis, b) GC/MS analysis .

**Estimated Structure for HPs on MS spectra**

| Table S1. Estimated Structure for ethoxysilane–TMS | | | | |
| --- | --- | --- | --- | --- |
| *M*W | structure | TEOS–TMS | HEDS–TMS | OETS–TMS |
|  |
| 365 | Si2O(OEt)6 |  | ○ |  |  |
| 409 | Si2O(OEt)5(OSiMe3) |  | ○ |  |  |
| 453 | Si2O(OEt)4(OSiMe3)2 |  | ○ |  |  |
| 497 | Si2O(OEt)3(OSiMe3)3 |  | ○ |  |  |
| 499 | Si3O2(OEt)8 |  | ○ | ○ |  |
| 543 | Si3O2(OEt)7(OSiMe3)1 | ○ | ○ | ○ |  |
| 587 | Si3O2(OEt)6(OSiMe3)2 | ○ | ○ | ○ |  |
| 603 | Si4O4(OEt)7(OSiMe3)1 | ○ |  |  |  |
| 631 | Si3O2(OEt)5(OSiMe3)3 | ○ | ○ | ○ |  |
| 633 | Si4O3(OEt)10 | ○ | ○ | ○ |  |
| 647 | Si4O4(OEt)6(OSiMe3)2 | ○ | ○ |  |  |
| 675 | Si3O2(OEt)4(OSiMe3)4 | ○ |  | ○ |  |
| 677 | Si4O3(OEt)9(OSiMe3)1 | ○ | ○ | ○ |  |
| 691 | Si4O4(OEt)5(OSiMe3)3 | ○ | ○ |  |  |
| 693 | Si5O5(OEt)10 |  | ○ |  |  |
| 721 | Si4O3(OEt)8(OSiMe3)2 | ○ | ○ | ○ |  |
| 737 | Si5O5(OEt)9(OSiMe3)1 | ○ | ○ |  |  |
| 765 | Si4O3(OEt)7(OSiMe3)3 | ○ | ○ | ○ |  |
| 767 | Si5O4(OEt)12 | ○ |  | ○ |  |
| 781 | Si5O5(OEt)8(OSiMe3)2 | ○ | ○ | ○ |  |
| 809 | Si4O3(OEt)6(OSiMe3)4 | ○ | ○ |  |  |
| 811 | Si5O4(OEt)11(OSiMe3)1 | ○ |  | ○ |  |
| 825 | Si5O5(OEt)7(OSiMe3)3 | ○ |  | ○ |  |
| 853 | Si4O3(OEt)5(OSiMe3)5 | ○ |  |  |  |
| 855 | Si5O4(OEt)10(OSiMe3)2 | ○ | ○ | ○ |  |
| 869 | Si5O5(OEt)6(OSiMe3)4 | ○ |  |  |  |
| 871 | Si6O6(OEt)11(OSiMe3)1 |  |  | ○ |  |
| 899 | Si5O4(OEt)9(OSiMe3)3 | ○ | ○ | ○ |  |
| 901 | Si6O5(OEt)14 | ○ |  | ○ |  |
| 913 | Si5O5(OEt)5(OSiMe3)5 | ○ |  |  |  |
| 915 | Si6O6(OEt)10(OSiMe3)2 | ○ |  | ○ |  |
| 917 | Si7O10(OEt)8(OSiMe3)2 |  |  | ○ |  |
| 931 | Si7O8(OEt)11(OSiMe3)1 | ○ |  |  |  |
| 943 | Si5O4(OEt)8(OSiMe3)4 | ○ |  | ○ |  |
| 945 | Si6O5(OEt)13(OSiMe3)1 | ○ |  | ○ |  |
| 959 | Si6O6(OEt)9(OSiMe3)3 | ○ | ○ | ○ |  |
| 961 | Si7O7(OEt)14 | ○ |  | ○ |  |
| 975 | Si7O8(OEt)10(OSiMe3)2 | ○ | ○ |  |  |
| 987 | Si5O4(OEt)7(OSiMe3)5 | ○ |  |  |  |
| 989 | Si6O5(OEt)12(OSiMe3)2 | ○ | ○ | ○ |  |
| 1003 | Si6O6(OEt)8(OSiMe3)4 | ○ |  |  |  |
| 1005 | Si7O7(OEt)13(OSiMe3)1 | ○ |  |  |  |
| 1031 | Si5O4(OEt)6(OSiMe3)6 | ○ |  |  |  |
| 1033 | Si6O5(OEt)11(OSiMe3)3 | ○ | ○ | ○ |  |
| 1047 | Si6O6(OEt)7(OSiMe3)5 | ○ | ○ |  |  |
| 1049 | Si7O7(OEt)12(OSiMe3)2 | ○ | ○ |  |  |
| 1077 | Si6O5(OEt)10(OSiMe3)4 | ○ | ○ | ○ |  |
| 1079 | Si7O6(OEt)15(OSiMe3)1 | ○ | ○ | ○ |  |
| 1093 | Si7O7(OEt)11(OSiMe3)3 | ○ | ○ |  |  |
| 1121 | Si6O5(OEt)9(OSiMe3)5 | ○ | ○ |  |  |
| 1137 | Si7O7(OEt)10(OSiMe3)4 | ○ |  |  |  |
| 1167 | Si7O6(OEt)13(OSiMe3)3 | ○ | ○ |  |  |
| 1211 | Si7O6(OEt)12(OSiMe3)4 | ○ | ○ |  |  |
| 1255 | Si7O6(OEt)11(OSiMe3)5 | ○ |  |  |  |
| 1257 | Si8O7(OEt)16(OSiMe3)2 | ○ | ○ |  |  |
| 1299 | Si7O6(OEt)10(OSiMe3)6 | ○ |  |  |  |
| 1301 | Si8O7(OEt)15(OSiMe3)3 | ○ |  |  |  |
| 1345 | Si8O7(OEt)14(OSiMe3)4 | ○ |  |  |  |

**FT-IR spectra of ethoxysilane–TMSs**

**
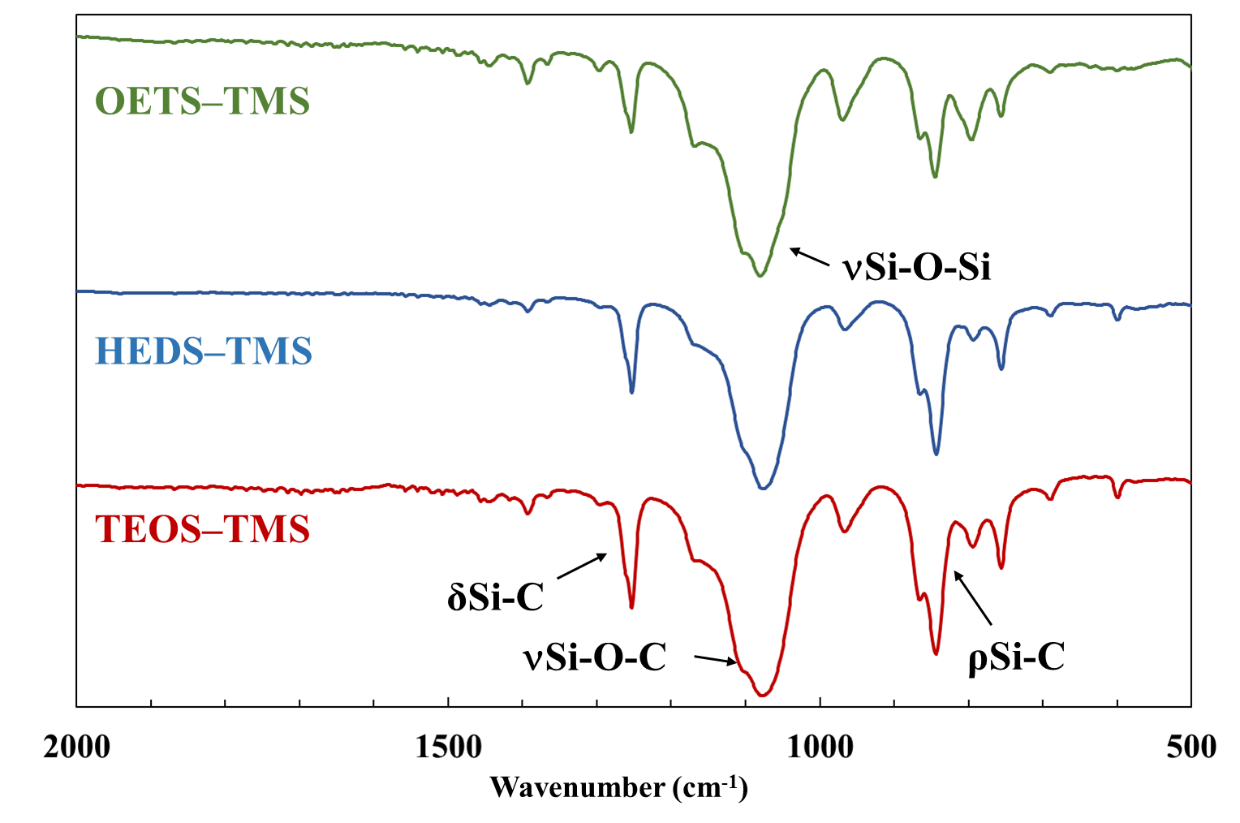
**

Figure S2 FT-IR spectra of top) OETS–TMS, middle) HEDS–TMS, and bottom) TEOS–TMS (neat method).

**GPC of oligomers**

**
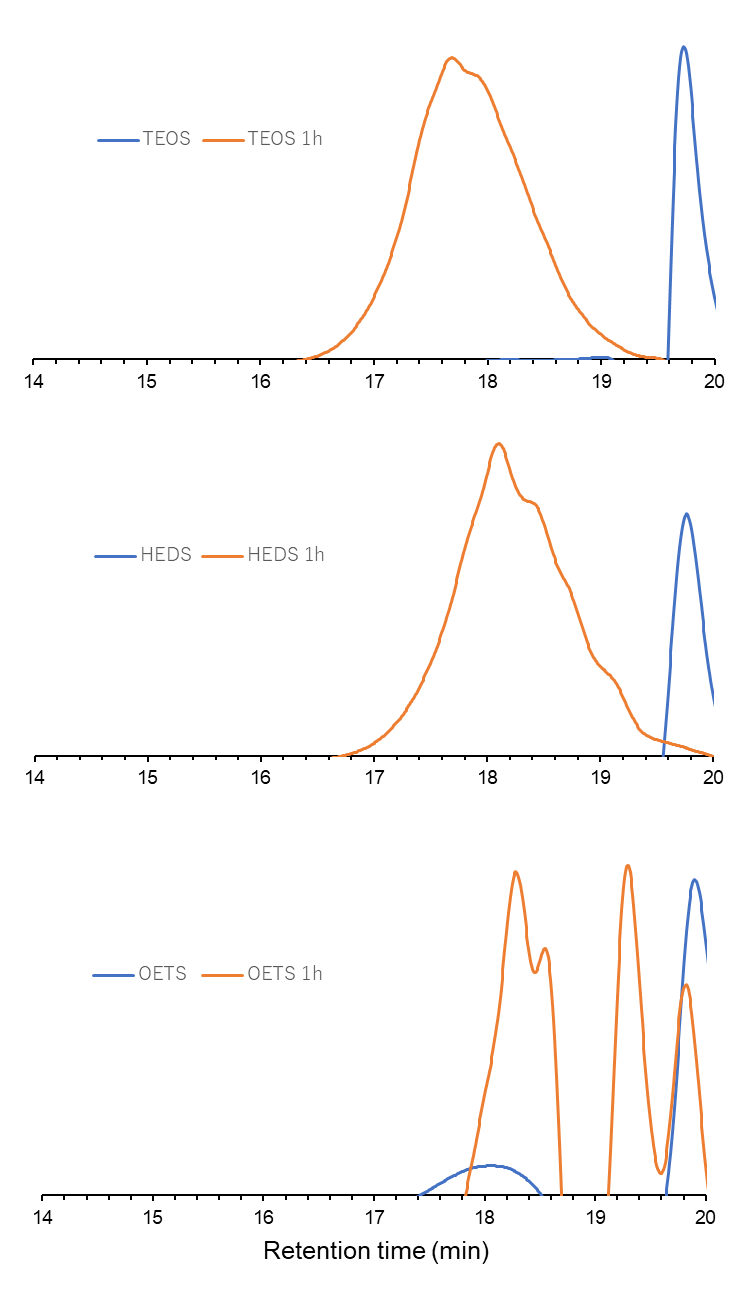
**

Figure S3. GPC chart of monomers and oligomers for 1 h

**Synthesis of Diethoxydiicocyanatosilane (DEDIS)**

According to a previous procedure [1]. A mixture of ethanol (9.2 g, 0.2 mol) and diethylether (40 ml) was added dropwise to a mixture of tetraisocyanatosilane (19.62 g, 0.1 mol) and diethylether (160 ml) at 0 °C. Then, a mixture was stirred at ca. 23 °C for ten min followed by stirring at 40 °C for o.n.. After the reaction, the solvent was evaporated. DEDIS was obtained as colorless liquid (18.4 g, 91%) by distillation (77.2–78.1℃, 23 mmHg).

1H NMR (400 MHz, CDCl3 / ppm): δ 3.88 (q, *J* = 6.0 Hz, CH2, 4H), 1.25 (t, *J* = 6.0 Hz, CH3, 6H).

29Si NMR (80 MHz, CDCl3 / ppm): δ −93.2.

**Synthesis of** **chloro(triethoxy)silane (CTES)**

According to a previous procedure [2,3]. A mixture of SOCl2 (23.9 g, 0.2 mol) and DMF (0.1 mL) was then cooled in an ice bath, and TEOS (20.5 g, 0.1 mol) was slowly added dropwise to a mixture and stirred for 1 h in the ice bath and then for o. n. at ca. 23 °C. Subsequently, the volatiles were evaporated under reduced pressure, followed by distillation under reduced pressure (67.0–68.8 °C, 76 mmHg) to give 89.3 g (92% yield) of CTES as a colorless liquid.

1H NMR (400 MHz, CDCl3 / ppm): δ 3.90 (q, 6H, J = 6.0 Hz, CH2), 1.26 (t, 9H, J = 6.0 Hz, CH3).

29Si NMR (80 MHz, CDCl3 / ppm): δ −70.1.

**Synthesis of** **triethoxysilanol (TESOL)**

According to a previous procedure [2,3]. CTES (9.98 g, 0.05 mol) dissolved in THF (100 mL) was added dropwise to a mixture of THF as received (250 mL), (NH4)2CO3 (24.22 g, 0.25 mol), and water (0.90 g, 0.05 mol) in an ice bath. The mixture was then stirred for 1 h at ca. 23 °C. After filtration, the volatiles were removed under reduced pressure, followed by vacuum distillation (b.p. 56.3–61.2 °C, 3.1 mmHg) to give 6.8 g (76% yield) of TESOL as a colorless liquid.

1H NMR (400 MHz, CDCl3): δ (ppm) 4.50 (s, 1H, OH), 3.83 (q, 6H, J = 6.0 Hz, CH2), 1.21 (t, 9H, J = 6.0 Hz, CH3).

13C NMR (125 MHz, CDCl3): δ (ppm) 18.0 (CH3), 59.4 (CH2).

29Si NMR (100 MHz, CDCl3): δ (ppm) −78.7.

FT-IR (neat, cm−1): 3403 (νO-H), 2976, 2929, 2895 (νC-H), 1170 (ρCH3), 1103 (νSi-O-C), 966 (νC-C), 905 (νSi-O-H).

**References**

[1] Abe Y, Motoyama K, Kobayashi T, Iwasaki S, Gunji T (1996) Syntheses of Alkoxyisocyanatosilanes from Tri- and Tetraisocyanatosilane. NIPPON KAGAKU KAISHI 1996:969–974. https://doi.org/10.1246/nikkashi.1996.969

[2] Kazakova VV, Gorbatsevich　OB, Skvortsova SA, Demchenko NV, Muzafarov AM (2005) Synthesis of triethoxysilanol. Russ. Chem. Bull. 54:1350–1351. https://doi.org/10.1007/s11172-005-0409-y

[3] Yamamoto K, Shimoda T, Sato Y, Nakaya T, Ohshita J, Gunji T (2022) Preparation and film properties of polysiloxanes consisting of di- and quadra-functional hybrid units. J. Sol-Gel Sci. Technol. 104:724–734. https://doi.org/10.1007/s10971-022-05806-zK
